# Supplementary material
Source: publisher figshare collection journal article supplement (https://tandf.figshare.com/ndownloader/files/12940592)
Supplement: Supplementary file 1 [file 12940592]

Correlation between SF-6D dimensions and QLQ-C30 scales

| **SF-6D dimensions**  **QLQ scales** | Physical Functioning | Role limitations | Social functioning | Pain | Mental health | Vitality |
| --- | --- | --- | --- | --- | --- | --- |
| Physical functioning | -0.7877 | -0.4299 | -0.5208 | -0.4087 | -0.3219 | -0.5084 |
| Global health status | -0.5855 | -0.5178 | -0.5799 | -0.4882 | -0.4659 | -0.5726 |
| Role functioning | -0.6488 | -0.3527 | -0.5158 | -0.4708 | -0.2926 | -0.3998 |
| Emotional functioning | -0.3427 | -0.4010 | -0.5202 | -0.3698 | -0.5217 | -0.4040 |
| Cognitive functioning | -0.3930 | -0.1422 | -0.2916 | -0.1976 | -0.2422 | -0.2403 |
| Social functioning | -0.4229 | -0.4584 | -0.6088 | -0.4298 | -0.3839 | -0.4311 |
| Fatigue | 0.6664 | 0.3759 | 0.5447 | 0.4567 | 0.3012 | 0.4759 |
| Nausea/vomiting | 0.2404 | 0.1597 | 0.2477 | 0.1963 | 0.1221 | 0.2487 |
| Pain | 0.3954 | 0.1920 | 0.3932 | 0.6540 | 0.2214 | 0.2664 |
| Dyspnea | 0.1693 | 0.1083 | 0.2087 | 0.2281 | 0.1255 | 0.1225 |
| Insomnia | 0.3780 | 0.2190 | 0.3191 | 0.3228 | 0.3119 | 0.3006 |
| Appetite loss | 0.3603 | 0.2411 | 0.4235 | 0.3279 | 0.2097 | 0.2707 |
| Constipation | 0.0713 | 0.0587 | 0.1337 | 0.1678 | 0.1209 | 0.1378 |
| Diarrhea | 0.1842 | 0.1686 | 0.1340 | 0.1185 | 0.1559 | 0.2808 |
| Financial problems | 0.2413 | 0.2642 | 0.2206 | 0.1889 | 0.2207 | 0.1834 |

Correlation between EQ-5D-5L dimensions and QLQ-C30 scales

| **EQ-5D-5L dimensions**  **QLQ scales** | Mobility | Self-care | Usual activities | Pain | Anxiety |
| --- | --- | --- | --- | --- | --- |
| Physical functioning | -0.6558 | -0.4259 | -0.7316 | -0.3771 | -0.1710 |
| Global health status | -0.5695 | -0.4022 | -0.6364 | -0.4221 | -0.3045 |
| Role functioning | -0.5230 | -0.3781 | -0.6602 | -0.3777 | -0.1490 |
| Emotional functioning | -0.3378 | -0.2748 | -0.3645 | -0.3838 | -0.5772 |
| Cognitive functioning | -0.3411 | -0.3412 | -0.2738 | -0.3838 | -0.2359 |
| Social functioning | -0.4850 | -0.2355 | -0.6140 | -0.2853 | -0.2602 |
| Fatigue | 0.5960 | 0.3454 | 0.5891 | -0.3904 | 0.2697 |
| Nausea/vomiting | 0.2647 | 0.2004 | 0.2503 | 0.4702 | 0.0914 |
| Pain | 0.3779 | 0.1711 | 0.4624 | 0.6474 | 0.0558 |
| Dyspnea | 0.1953 | 0.2111 | 0.1629 | 0.1774 | 0.2397 |
| Insomnia | 0.2921 | 0.1445 | 0.3144 | 0.4288 | 0.2177 |
| Appetite loss | 0.3465 | 0.2574 | 0.3614 | 0.3745 | 0.1659 |
| Constipation | 0.1022 | 0.0296 | 0.0979 | 0.2038 | 0.0538 |
| Diarrhea | 0.2026 | 0.0646 | 0.1965 | 0.0127 | 0.1725 |
| Financial problems | 0.1846 | 0.0730 | 0.3424 | 0.0624 | 0.2114 |
